# Supplementary material for: PEGylated gene carriers in serum under shear flow
Source: Royal Society of Chemistry journal article supplement (doi:10.1039/c9sm02397f), 2020-01-01
Supplement: c9sm02397f1.pdf [file c9sm02397f1.pdf]

Supporting information for

## PEGylated gene carriers in serum under shear flow

Dongxiao Yin, Hao Wen, Guangqi Wu, Shaolu Li, Chenyang Liu, Hua Lu\*, Dehai Liang\*

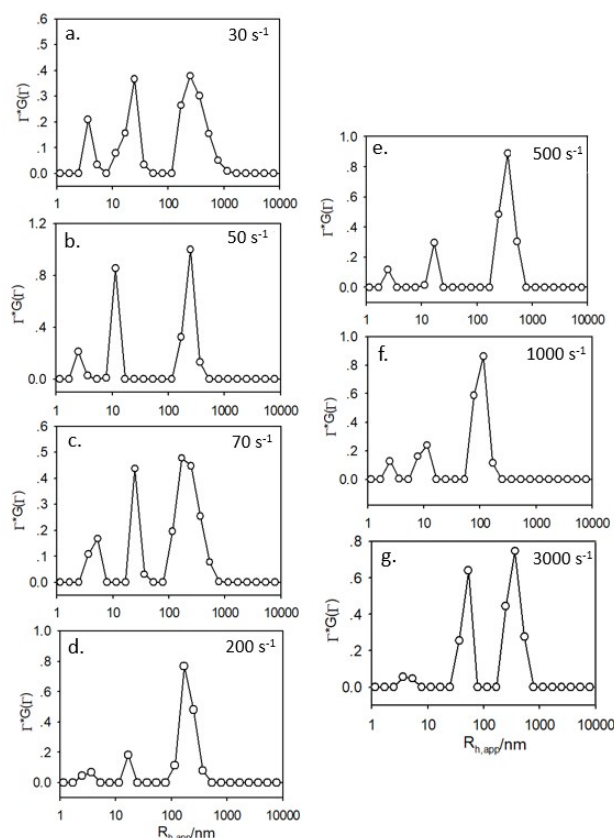

Fig.S1 Size distribution of PEG<sub>10k</sub>-PLL/salmon DNA/FBS after being sheared for 2 hrs at different shear rate of 30 s<sup>-1</sup>(a), 50 s<sup>-1</sup>(b), 70 s<sup>-1</sup>(c), 200 s<sup>-1</sup>(d), 500 s<sup>-1</sup>(e), 1000 s<sup>-1</sup>(f), 3000 s<sup>-1</sup>(g). The +/- ratio of PEG<sub>10k</sub>-PLL /salmon DNA complex is 20. Scattered angle: 30°.

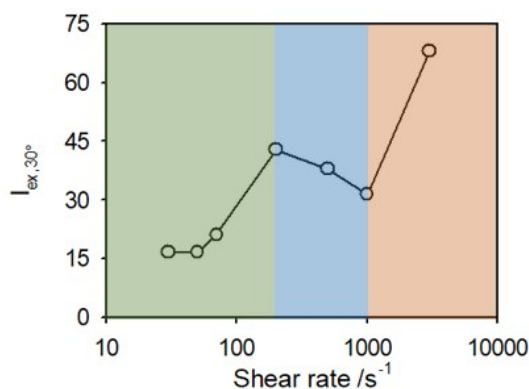

Fig.S2 Shear rate dependence of  $I_{ex}$  of PEG<sub>10k</sub>-PLL/ salmon DNA/FBS after being sheared for 2 hrs. The +/- ratio of PEG<sub>10k</sub>-PLL /salmon DNA complex is 20. Scattering angle: 30°.

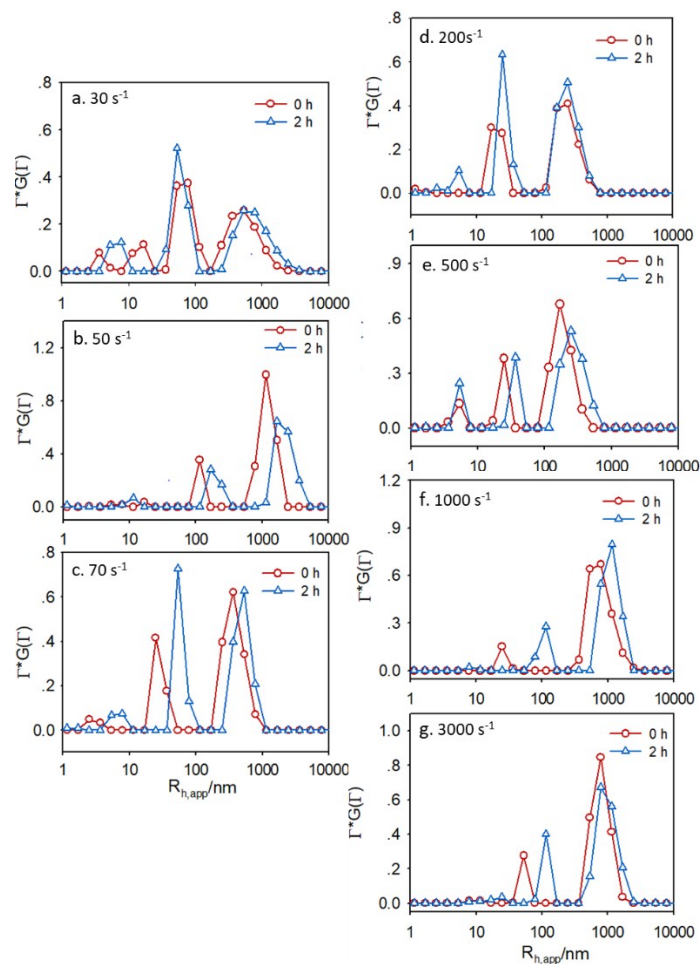

Fig.S3 Size distribution of PEG<sub>5k</sub>-PLL/DNA/FBS 0 h and 2 hrs after treatment at shear rates of 30 s<sup>-1</sup>(a), 50 s<sup>-1</sup>(b), 70 s<sup>-1</sup>(c), 200 s<sup>-1</sup>(d), 500 s<sup>-1</sup>(e), 1000 s<sup>-1</sup>(f), 3000 s<sup>-1</sup>(g). Scattered angle: 30°

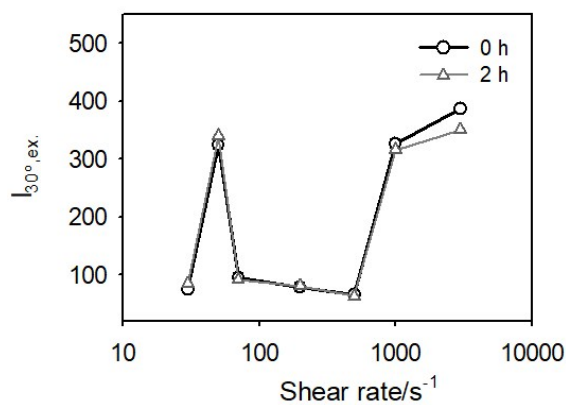

Fig. S4 The excess scattered intensity of PEG<sub>5k</sub>-PLL/DNA/FBS 0 hr and 2 hrs after treatment at different shear rates.
